# Supplementary material
Source: publisher figshare collection journal article supplement (https://springernature.figshare.com/ndownloader/files/7879255)
Supplement: Supplementary file 1 [file 7879255]

Additional file 1

**Hexbug Lesson Survey**

After participating in the Hexbug Activity, individually answer the following questions.

_____________________________________________________________________

What did you think of the activity? What aspects were engaging for you as a participant? What aspects were not engaging?

_____________________________________________________________________

What concepts (mathematical, scientific, and/or engineering) were present in the activity?

___________________________________________________________________

How could you enhance this activity to make it more engaging and incorporate additional learning concepts?
